# Supplementary material
Source: ML conference proceedings conference paper supplement (https://openreview.net/forum?id=eT6zYrd1wl)
Supplement: supplementary_material [file attachment]

# SoLAR: SURROGATE LABEL AWARE GNN REWIRING

**Anonymous authors**

Paper under double-blind review

Link to the code base :

<https://anonymous.4open.science/r/SoLAR4356/README.md>.
